# Supplementary material for: The effect of substitution on the unimolecular reaction rates of stabilized Criegee intermediates
Source: Royal Society of Chemistry journal article supplement (doi:10.1039/d5cp04958j), 2026-04-21
Supplement: d5cp04958j1.pdf [file d5cp04958j1.pdf]

Supporting information for  
The Effect of Substitution on the Unimolecular Reaction Rates  
of Stabilized Criegee Intermediates

A. Koskinen, S. Juttula, D. Pasik, and N. Myllys

## Fastest unimolecular reaction rates

The fastest unimolecular reaction rates at DLPNO-CCSD(T)/aug-cc-pVTZ//UM06-2X/aug-cc-pVTZ level of theory using LC-TST for all structures are listed in table S1. Structures that were used to investigate the discrepancy in sabinene-SCI results are not listed in any of the tables in the supplementary information.

Table S1: Calculated energy barrier heights ( $\Delta E^{TS}$ ; kcal/mol), Eckart tunneling coefficients ( $\kappa_t$ ) for H-shifts, and unimolecular LC-TST reaction rate coefficients ( $k_{uni}$ , s<sup>-1</sup>) at 298 K for the fastest unimolecular reactions of the SCI structures.

| SCI                     | reaction         | $\Delta E^{TS}$ | $\kappa_t$ | $k_{uni}$            |
|-------------------------|------------------|-----------------|------------|----------------------|
| anti-met-SCI            | 1,3-ring closure | 15.58           | -          | 33.7                 |
| syn-met-SCI             | 1,4-H-shift      | 16.29           | 58.9       | 207                  |
| anti-tBu-SCI            | 1,3-ring closure | 15.18           | -          | 45.4                 |
| syn-tBu-SCI             | 1,3-ring closure | 20.98           | -          | $2.75 \cdot 10^{-3}$ |
| (tBu) <sub>2</sub> -SCI | 1,3-ring closure | 20.03           | -          | $2.08 \cdot 10^{-2}$ |
| cyc3-SCI                | 1,3-ring closure | 15.86           | -          | 9.91                 |
| cyc4-SCI                | 1,4-H-shift      | 18.64           | 46.5       | 1.04                 |
| cyc5-SCI                | 1,4-H-shift      | 16.73           | 48.1       | 79.6                 |
| cyc6-SCI                | 1,4-H-shift      | 14.52           | 35.6       | $1.40 \cdot 10^3$    |
| cycpent-SCI             | 1,3-ring closure | 18.27           | -          | 0.190                |
| cychex-SCI              | 1,3-ring closure | 17.19           | -          | 1.07                 |
| anti-pent-SCI           | 1,3-ring closure | 15.88           | -          | 12.7                 |
| syn-pent-SCI            | 1,5-ring closure | 14.38           | -          | 63.7                 |
| anti-ben-SCI            | 1,3-ring closure | 14.40           | -          | 122                  |
| syn-ben-SCI             | 1,3-ring closure | 22.50           | -          | $1.85 \cdot 10^{-4}$ |
| syn-ben-met-SCI         | 1,3-ring closure | 18.51           | -          | 0.113                |
| (ben) <sub>2</sub> -SCI | 1,3-ring closure | 16.34           | -          | 4.22                 |
| anti-ald3-SCI           | 1,3-ring closure | 15.61           | -          | 18.0                 |
| anti-ald4-SCI           | 1,3-ring closure | 14.80           | -          | 61.9                 |
| anti-ald5-SCI           | 1,3-ring closure | 13.99           | -          | 230                  |
| anti-ald6-SCI           | SOZ formation    | 5.12            | -          | $8.26 \cdot 10^7$    |
| syn-ald3-SCI            | 1,4-H-shift      | 12.16           | 21.7       | $6.05 \cdot 10^4$    |
| syn-ald4-SCI            | SOZ formation    | 3.71            | -          | $9.01 \cdot 10^8$    |
| syn-ald5-SCI            | SOZ formation    | 2.46            | -          | $1.63 \cdot 10^{10}$ |
| syn-ald6-SCI            | SOZ formation    | 2.99            | -          | $5.78 \cdot 10^8$    |
| anti- $\beta$ B-cam-SCI | 1,3-ring closure | 18.65           | -          | $9.93 \cdot 10^{-2}$ |
| syn- $\beta$ B-cam-SCI  | 1,3-ring closure | 16.31           | -          | 3.05                 |
| anti- $\beta$ B-pin-SCI | 1,4-H-shift      | 15.24           | 42.4       | 835                  |
| syn- $\beta$ B-pin-SCI  | 1,3-ring closure | 16.98           | -          | 1.55                 |
| anti- $\beta$ B-sab-SCI | 1,4-H-shift      | 15.03           | 36.7       | 937                  |
| syn- $\beta$ B-sab-SCI  | 1,3-ring closure | 16.70           | -          | 2.18                 |

## All calculated unimolecular reaction rates

Reaction rate coefficients for all investigated reactions are listed in table S2. Reaction rate coefficients were calculated at DLPNO-CCSD(T)/aug-cc-pVTZ//UM06-2X/aug-cc-pVTZ level of theory utilizing LC-TST at 298 K.

Table S2: All calculated reaction coefficients for all investigated structures. For every reaction reaction barriers  $\Delta E^{\text{TS}}$  (kcal/mol) and rate coefficients  $k_{\text{uni}}$  are listed. For H-shifts the tunneling coefficients  $\kappa_t$  are also listed. Table continues on the next page.

| SCI                     | reaction         | $\Delta E^{\text{TS}}$ | $\kappa_t$ | $k_{\text{uni}}$      |
|-------------------------|------------------|------------------------|------------|-----------------------|
| anti-met-SCI            | 1,3-H-shift      | 27.68                  | 190        | $9.67 \cdot 10^{-6}$  |
|                         | 1,3-ring closure | 15.58                  | -          | 33.7                  |
| syn-met-SCI             | 1,4-H-shift      | 16.29                  | 59         | 207                   |
|                         | 1,3-ring closure | 23.61                  | -          | $3.51 \cdot 10^{-5}$  |
| anti-tBu-SCI            | 1,3-H-shift      | 27.70                  | 161        | $7.12 \cdot 10^{-6}$  |
|                         | 1,3-ring closure | 15.18                  | -          | 45.4                  |
| syn-tBu-SCI             | 1,5-H-shift      | 34.51                  | 96         | $1.09 \cdot 10^{-11}$ |
|                         | 1,3-ring closure | 20.98                  | -          | $2.75 \cdot 10^{-3}$  |
| (tBu) <sub>2</sub> -SCI | 1,5-H-shift      | 34.34                  | 23         | $5.77 \cdot 10^{-12}$ |
|                         | 1,3-ring closure | 20.03                  | -          | $2.08 \cdot 10^{-2}$  |
| cyc3-SCI                | 1,4-H-shift      | 25.55                  | 86         | $4.60 \cdot 10^{-5}$  |
|                         | 1,3-ring closure | 15.86                  | -          | 9.91                  |
| cyc4-SCI                | 1,4-H-shift      | 18.64                  | 47         | 1.04                  |
|                         | 1,3-ring closure | 16.65                  | -          | 0.986                 |
| cyc5-SCI                | 1,4-H-shift      | 16.73                  | 48         | 79.6                  |
|                         | 1,3-ring closure | 19.16                  | -          | $3.88 \cdot 10^{-2}$  |
| cyc6-SCI                | 1,4-H-shift      | 14.52                  | 36         | $1.40 \cdot 10^3$     |
|                         | 1,3-ring closure | 19.04                  | -          | $2.61 \cdot 10^{-2}$  |
| cycpent-SCI             | 1,3-ring closure | 18.27                  | -          | 0.190                 |
| cychex-SCI              | 1,3-ring closure | 17.19                  | -          | 1.07                  |
| anti-pent-SCI           | 1,3-H-shift      | 28.76                  | 182        | $1.03 \cdot 10^{-6}$  |
|                         | 1,3-ring closure | 15.88                  | -          | 12.7                  |
| syn-pent-SCI            | 1,3-ring closure | 21.17                  | -          | $1.81 \cdot 10^{-3}$  |
|                         | 1,5-ring closure | 14.38                  | -          | 63.7                  |
| anti-ben-SCI            | 1,3-H-shift      | 28.48                  | 172        | $1.51 \cdot 10^{-6}$  |
|                         | 1,3-ring closure | 14.40                  | -          | 122                   |
| syn-ben-SCI             | 1,3-ring closure | 22.50                  | -          | $1.85 \cdot 10^{-4}$  |
|                         | 1,5-ring closure | 23.26                  | -          | $1.79 \cdot 10^{-5}$  |
| syn-ben-met-SCI         | 1,3-ring closure | 18.51                  | -          | 0.113                 |
|                         | 1,5-ring closure | 21.00                  | -          | $1.33 \cdot 10^{-3}$  |
| (ben) <sub>2</sub> -SCI | 1,3-ring closure | 16.34                  | -          | 4.22                  |
|                         | 1,5-ring closure | 19.91                  | -          | $6.02 \cdot 10^{-3}$  |

Table S2: (continued) All calculated reaction coefficients for all structures for which all of the possible or feasible reactions were investigated. For every reaction reaction barriers  $\Delta E^{\text{TS}}$  (kcal/mol) and rate coefficients  $k_{\text{uni}}$  are listed. For H-shifts the tunneling coefficients  $\kappa_t$  are also listed. <sup>1</sup>=product is a open chain species and not cyclic

| SCI                     | reaction                   | $\Delta E^{\text{TS}}$ | $\kappa_t$ | $k_{\text{uni}}$      |
|-------------------------|----------------------------|------------------------|------------|-----------------------|
| anti-ald3-SCI           | 1,3-H-shift                | 28.39                  | 242        | $1.89 \cdot 10^{-6}$  |
|                         | 1,3-ring closure           | 15.61                  | -          | 18.0                  |
| anti-ald4-SCI           | 1,3-H-shift                | 27.79                  | 176        | $5.16 \cdot 10^{-6}$  |
|                         | 1,3-ring closure           | 14.80                  | -          | 61.9                  |
|                         | SOZ formation              | 33.83                  | -          | $3.05 \cdot 10^{-14}$ |
| anti-ald5-SCI           | 1,3-H-shift                | 27.84                  | 156        | $3.69 \cdot 10^{-6}$  |
|                         | 1,3-ring closure           | 13.99                  | -          | 230                   |
|                         | SOZ formation              | 14.98                  | -          | 1.49                  |
| anti-ald6-SCI           | 1,3-H-shift                | 28.68                  | 140        | $2.63 \cdot 10^{-6}$  |
|                         | 1,3-ring closure           | 13.93                  | -          | 396                   |
|                         | SOZ formation              | 5.12                   | -          | $8.26 \cdot 10^7$     |
| syn-ald3-SCI            | 1,4-H-shift                | 12.16                  | 22         | $6.05 \cdot 10^4$     |
|                         | 1,3-ring closure           | 23.26                  | -          | $5.09 \cdot 10^{-5}$  |
|                         | SOZ formation <sup>1</sup> | 13.35                  | -          | 113                   |
| syn-ald4-SCI            | 1,4-H-shift                | 17.49                  | 50         | 31.9                  |
|                         | 1,3-ring closure           | 23.11                  | -          | $4.09 \cdot 10^{-5}$  |
|                         | SOZ formation              | 3.71                   | -          | $9.01 \cdot 10^8$     |
| syn-ald5-SCI            | 1,4-H-shift                | 16.46                  | 43         | 734                   |
|                         | 1,3-ring closure           | 21.56                  | -          | $1.01 \cdot 10^{-3}$  |
|                         | SOZ formation              | 2.46                   | -          | $1.63 \cdot 10^{10}$  |
| syn-ald6-SCI            | 1,4-H-shift                | 15.81                  | 43         | 309                   |
|                         | 1,3-ring closure           | 23.34                  | -          | $1.18 \cdot 10^{-5}$  |
|                         | SOZ formation              | 2.99                   | -          | $5.78 \cdot 10^8$     |
| anti- $\beta$ B-cam-SCI | 1,5-H-shift                | 35.64                  | 16         | $3.23 \cdot 10^{-13}$ |
|                         | 1,3-ring closure           | 18.65                  | -          | $9.93 \cdot 10^{-2}$  |
| syn- $\beta$ B-cam-SCI  | 1,4-H-shift                | 30.24                  | 3          | $6.99 \cdot 10^{-10}$ |
|                         | 1,3-ring closure           | 16.31                  | -          | 3.05                  |
| anti- $\beta$ B-pin-SCI | 1,4-H-shift                | 15.24                  | 42         | 835                   |
|                         | 1,3-ring closure           | 20.93                  | -          | $1.55 \cdot 10^{-3}$  |
| syn- $\beta$ B-pin-SCI  | 1,4-H-shift                | 24.88                  | 4          | $7.07 \cdot 10^{-6}$  |
|                         | 1,3-ring closure           | 16.98                  | -          | 1.55                  |
| anti- $\beta$ B-sab-SCI | 1,4-H-shift                | 15.03                  | 37         | 937                   |
|                         | 1,3-ring closure           | 17.07                  | -          | 1.14                  |
| syn- $\beta$ B-sab-SCI  | 1,4-H-shift                | 23.68                  | 6          | $1.54 \cdot 10^{-4}$  |
|                         | 1,3-ring closure           | 16.70                  | -          | 2.18                  |

## Unimolecular reaction coefficients in this study compared to literature values

Unimolecular reaction coefficients at 298 K acquired at DLPNO-CCSD(T)/aug-cc-pVTZ//UM06-2X/aug-cc-pVTZ level of theory utilizing LC-TST compared to selected theoretical and/or experimental values in the literature are listed in table S3.

Table S3: The results obtained in this study compared to results in the literature. All of the results in the literature for anti-met-SCI and syn-met-SCI are not listed in this table. Theoretical results from the literature are marked with T and experimental with E.

| SCI                     | $k_{\text{uni}}$     | $k_{\text{uni}}$ , literature                                                         | reference                                                                                                                                                                     |
|-------------------------|----------------------|---------------------------------------------------------------------------------------|-------------------------------------------------------------------------------------------------------------------------------------------------------------------------------|
| anti-met-SCI            | 33.7                 | T: 55.4<br>T: 104<br>E: > 3*                                                          | Long et al. 2016 <sup>1</sup><br>Vereecken et al. 2017 <sup>2</sup><br>Berndt et al. 2015 <sup>3</sup>                                                                        |
| syn-met-SCI             | 207                  | E: 288±275<br>E+T**: 150 <sup>+176</sup> <sub>-81</sub><br>T: 166<br>T: 328<br>T: 257 | Newland et al. 2015 <sup>4</sup><br>Robinson et al. 2022 <sup>5</sup><br>Fang et al. 2016 <sup>6</sup><br>Long et al. 2016 <sup>1</sup><br>Vereecken et al. 2017 <sup>2</sup> |
| anti-tBu-SCI            | 45.4                 | T: 111                                                                                | Vereecken et al. 2017 <sup>2</sup>                                                                                                                                            |
| syn-tBu-SCI             | $2.75 \cdot 10^{-3}$ | T: $1.0 \cdot 10^{-2}$                                                                | Vereecken et al. 2017 <sup>2</sup>                                                                                                                                            |
| (tBu) <sub>2</sub> -SCI | $2.08 \cdot 10^{-2}$ | T: $7.5 \cdot 10^{-2}$                                                                | Vereecken et al. 2017 <sup>2</sup>                                                                                                                                            |
| cyc3-SCI                | 9.91                 | -                                                                                     | -                                                                                                                                                                             |
| cyc4-SCI                | 1.04                 | -                                                                                     | -                                                                                                                                                                             |
| cyc5-SCI                | 79.6                 | -                                                                                     | -                                                                                                                                                                             |
| cyc6-SCI                | 1400                 | E: 1998±147                                                                           | Peltola et al. 2024 <sup>7</sup>                                                                                                                                              |
| cycpent-SCI             | 0.190                | -                                                                                     | -                                                                                                                                                                             |
| cychex-SCI              | 1.07                 | -                                                                                     | -                                                                                                                                                                             |
| anti-pent-SCI           | 12.7                 | -                                                                                     | -                                                                                                                                                                             |
| syn-pent-SCI            | 63.7                 | -                                                                                     | -                                                                                                                                                                             |
| anti-ben-SCI            | 122                  | T: 141.85                                                                             | Yu et al. 2025 <sup>8</sup>                                                                                                                                                   |
| syn-ben-SCI             | $1.85 \cdot 10^{-4}$ | T: $4.22 \cdot 10^{-4}$                                                               | Yu et al. 2025 <sup>8</sup>                                                                                                                                                   |
| syn-ben-met-SCI         | 0.113                | -                                                                                     | -                                                                                                                                                                             |
| (ben) <sub>2</sub>      | 4.22                 | -                                                                                     | -                                                                                                                                                                             |
| anti-ald3-SCI           | 18.0                 | -                                                                                     | -                                                                                                                                                                             |
| anti-ald4-SCI           | 61.9                 | -                                                                                     | -                                                                                                                                                                             |
| anti-ald5-SCI           | 230                  | T: 194                                                                                | Long et al. 2019 <sup>9</sup>                                                                                                                                                 |
| anti-ald6-SCI           | $8.26 \cdot 10^7$    | T: $2.44 \cdot 10^7$                                                                  | Long et al. 2019 <sup>9</sup>                                                                                                                                                 |
| syn-ald3-SCI            | $6.05 \cdot 10^4$    | -                                                                                     | -                                                                                                                                                                             |
| syn-ald4-SCI            | $9.01 \cdot 10^8$    | -                                                                                     | -                                                                                                                                                                             |
| syn-ald5-SCI            | $1.63 \cdot 10^{10}$ | T: $7.14 \cdot 10^9$                                                                  | Long et al. 2019 <sup>9</sup>                                                                                                                                                 |
| syn-ald6-SCI            | $5.78 \cdot 10^8$    | T: $3.24 \cdot 10^8$                                                                  | Long et al. 2019 <sup>9</sup>                                                                                                                                                 |
| anti-cam-SCI            | 3.05                 | -                                                                                     | -                                                                                                                                                                             |
| syn-cam-SCI             | $9.93 \cdot 10^{-2}$ | -                                                                                     | -                                                                                                                                                                             |
| anti-pin-SCI            | 835                  | T: 375                                                                                | Vereecken et al. 2017 <sup>2</sup>                                                                                                                                            |
| syn-pin-SCI             | 1.55                 | T: 2.0                                                                                | Vereecken et al. 2017 <sup>2</sup>                                                                                                                                            |
| anti-sab-SCI            | 937                  | T: 2740                                                                               | Wang et al. 2017 <sup>10</sup>                                                                                                                                                |
| syn-sab-SCI             | 2.18                 | T: 0.97                                                                               | Wang et al. 2017 <sup>10</sup>                                                                                                                                                |

\*at 297 K, \*\*Fit to experimental results using Master Equation Solver for Multi-Energy well Reactions (MESMER)

## Reaction barriers obtained with multireference calculations compared to DFT and CCSD(T) barriers

Unimolecular reaction barriers acquired at CASSCF, CASPT2, and DLPNO-NEVPT2 levels of theory compared to barriers obtained with DFT UM06-2X/aug-cc-pVTZ (Table S4) and CCSD(T)-F12/cc-pVTZ levels of theory (Table S5). As CCSD(T)-F12/cc-pVTZ is the most computationally expensive CCSD(T) level of theory benchmarked in this study, multireference methods were compared to the results obtained with it. Additionally, the differences in the barriers obtained with DLPNO-CCSD(T)/aug-cc-pVTZ and different multireference methods are presented in Table S6. This was done as the reaction rate coefficients in this study were calculated at DLPNO-CCSD(T)/aug-cc-pVTZ//UM06-2X/aug-cc-pVTZ level of theory.

Table S4: The difference between energy barriers obtained with DFT UM06-2X/aug-cc-pVTZ and used multireference methods (CASSCF, CASPT2, and DLPNO-NEVPT2). The reactions are numbered as follows: 1=syn, 1,4-H-shift; 2=syn, 1,3-ring closure; 3=syn, in-plane stereoisomerization; 4=anti, 1,3-H-shift; 5=anti, 1,3-ring closure; 6=anti, in-plane stereoisomerization. MAE stands for mean absolute error. Zero-point energies used in the CASSCF, CASPT2, and DLPNO-NEVPT2 results were obtained at CASSCF/aug-cc-pVTZ level of theory.

|              | $\Delta E_1$ | $\Delta E_2$ | $\Delta E_3$ | $\Delta E_4$ | $\Delta E_5$ | $\Delta E_6$ | MAE |
|--------------|--------------|--------------|--------------|--------------|--------------|--------------|-----|
| CASSCF       | 1.6          | 0.0          | 5.1          | -5.3         | 1.0          | 7.0          | 3.3 |
| CASPT2       | 1.8          | 0.5          | 6.4          | -0.1         | -3.0         | 4.0          | 2.6 |
| DLPNO-NEVPT2 | 4.6          | -0.7         | 1.7          | 0.2          | -5.0         | 1.1          | 2.2 |

Table S5: The difference between energy barriers obtained with CCSD(T)-F12/cc-pVTZ and used multireference methods (CASSCF, CASPT2, and DLPNO-NEVPT2). The reactions are numbered as follows: 1=syn, 1,4-H-shift; 2=syn, 1,3-ring closure; 3=syn, stereoisomerization; 4=anti, 1,3-H-shift; 5=anti, 1,3-ring closure; 6=anti, stereoisomerization. MAE stands for mean absolute error. Zero-point energies used in the CASSCF, CASPT2, and DLPNO-NEVPT2 results were obtained at CASSCF/aug-cc-pVTZ level of theory.

|              | $\Delta E_1$ | $\Delta E_2$ | $\Delta E_3$ | $\Delta E_4$ | $\Delta E_5$ | $\Delta E_6$ | MAE |
|--------------|--------------|--------------|--------------|--------------|--------------|--------------|-----|
| CASSCF       | 0.8          | 1.7          | 1.5          | -5.0         | 3.1          | 3.5          | 2.6 |
| CASPT2       | 1.0          | 2.2          | 2.8          | 0.2          | -0.9         | 0.6          | 1.3 |
| DLPNO-NEVPT2 | 3.8          | 1.0          | -1.9         | 0.5          | 2.9          | -4.5         | 2.4 |

Table S6: The difference between energy barriers obtained with DLPNO-CCSD(T)/aug-cc-pVTZ and used multireference methods (CASSCF, CASPT2, and DLPNO-NEVPT2). The reactions are numbered as follows: 1=syn, 1,4-H-shift; 2=syn, 1,3-ring closure; 3=syn, stereoisomerization; 4=anti, 1,3-H-shift; 5=anti, 1,3-ring closure; 6=anti, stereoisomerization. MAE stands for mean absolute error. Zero-point energies used in the CASSCF, CASPT2, and DLPNO-NEVPT2 results were obtained at CASSCF/aug-cc-pVTZ level of theory.

|              | $\Delta E_1$ | $\Delta E_2$ | $\Delta E_3$ | $\Delta E_4$ | $\Delta E_5$ | $\Delta E_6$ | MAE |
|--------------|--------------|--------------|--------------|--------------|--------------|--------------|-----|
| CASSCF       | 0.6          | 1.7          | 2.0          | -4.8         | 3.0          | 4.0          | 2.7 |
| CASPT2       | 0.8          | 2.1          | 3.2          | 0.5          | -0.9         | 1.1          | 1.5 |
| DLPNO-NEVPT2 | 3.6          | 1.0          | -1.4         | 0.8          | -2.9         | -4.0         | 2.3 |

## References

- [1] B. Long, J. L. Bao and D. G. Truhlar, Atmospheric Chemistry of Criegee Intermediates: Unimolecular Reactions and Reactions with Water, *Journal of the American Chemical Society*, 2016, **138**, 14409–14422.
- [2] L. Vereecken, A. Novelli and D. Taraborrelli, Unimolecular decay strongly limits the atmospheric impact of Criegee intermediates, *Physical Chemistry Chemical Physics*, 2017, **19**, 31599–31612.
- [3] T. Berndt, R. Kaethner, J. Voigtländer, F. Stratmann, M. Pfeifle, P. Reichle, M. Sipilä, M. Kulmala and M. Olzmann, Kinetics of the unimolecular reaction of CH<sub>2</sub>OO and the bimolecular reactions with the water monomer, acetaldehyde and acetone under atmospheric conditions, *Physical Chemistry Chemical Physics*, 2015, **17**, 19862–19873.
- [4] M. J. Newland, A. R. Rickard, M. S. Alam, L. Vereecken, A. Muñoz, M. Ródenas and W. J. Bloss, Kinetics of stabilised Criegee intermediates derived from alkene ozonolysis: reactions with SO<sub>2</sub>, H<sub>2</sub>O and decomposition under boundary layer conditions, *Physical Chemistry Chemical Physics*, 2015, **17**, 4076–4088.
- [5] C. Robinson, L. Onel, J. Newman, R. Lade, K. Au, L. Sheps, D. E. Heard, P. W. Seakins, M. A. Blitz and D. Stone, Unimolecular Kinetics of Stabilized CH<sub>3</sub>CHOO Criegee Intermediates: *syn*-CH<sub>3</sub>CHOO Decomposition and *anti*-CH<sub>3</sub>CHOO Isomerization, *The Journal of Physical Chemistry A*, 2022, **126**, 6984–6994.
- [6] Y. Fang, F. Liu, V. P. Barber, S. J. Klippenstein, A. B. McCoy and M. I. Lester, Communication: Real time observation of unimolecular decay of Criegee intermediates to OH radical products, *The Journal of Chemical Physics*, 2016, **144**, 061102.
- [7] J. Peltola, P. Heinonen and A. Eskola, Direct Kinetic Measurements of a Cyclic Criegee Intermediate; Unimolecular Decomposition of *c*-(CH<sub>2</sub>)<sub>5</sub>COO, *The Journal of Physical Chemistry Letters*, 2024, **15**, 5331–5336.
- [8] S. Yu, S. Tong, M. Chen, H. Zhang, Y. Xu, Y. Guo and M. Ge, Characterization of Key Intermediates and Products from the Ozonolysis of Styrene-Like Compounds, *Environmental Science & Technology*, 2025, **59**, 11666–11676.
- [9] B. Long, J. L. Bao and D. G. Truhlar, Rapid unimolecular reaction of stabilized Criegee intermediates and implications for atmospheric chemistry, *Nature Communications*, 2019, **10**, 2003.
- [10] L. Wang and L. Wang, Mechanism of gas-phase ozonolysis of sabinene in the atmosphere, *Physical Chemistry Chemical Physics*, 2017, **19**, 24209–24218.
